# Supplementary material for: A heterodinuclear RuIr metal complex for direct imaging of rRNA in living cells
Source: Royal Society of Chemistry journal article supplement (doi:10.1039/c4cc04501g), 2014-01-01
Supplement: c4cc04501g1.pdf [file c4cc04501g1.pdf]

## Supporting information

### Materials and General Instruments

Doubly purified water used in all experiments is from Milli-Q systems. Other solvents and reagents were of analytical grade and used without further purification. Stock of ct-DNA, chymotrysin, lysozyme, human serum albumin (HSA), protease and bovine serum albumin (BSA) were obtained from Sigma Chemical Co. (USA). RNA (*S. cerevisiae* RNA) was purchased from TaKaRa Biotechnology (Dalian) Co., Ltd. Hoechst 33258, SYTO RNA-select were purchased from Molecular Probes. DNase and RNase were purchased from Sigma.

$^1\text{H}$  NMR and  $^{13}\text{C}$  NMR spectra were recorded on a VARIAN INOVA-400 spectrometer with chemical shifts reported as ppm. Mass spectrometric data were obtained on a Q-ToF MS spectrometer (Micromass, Manchester, England). Absorption spectra were measured on a Perkin-Elmer Lambda35 UV-Vis spectrophotometer. Luminescence measurements were performed on a VARIAN CARY Eclipse Fluorescence Spectrophotometer.

### General Methods

All reactions were carried out under a nitrogen atmosphere. Silica gel (200-300 mesh) was used for flash column chromatography. Phosphate buffered saline (PBS) (pH = 7.5, 20 mM) was prepared using doubly purified water. Stock of ct-DNA, chymotrysin, lysozyme, human serum albumin (HSA), protease and bovine serum albumin (BSA) are prepared by dissolving them in doubly purified water. The concentration of ct-DNA is determined spectrophotometrically using the molar absorption coefficients of  $\epsilon_{260\text{ nm}} = 6600\text{ M}^{-1}\text{ cm}^{-1}$ . 1 mM stock solutions of **RuIr**, **RuRu** and **IrIr** were prepared in DMSO for the absorption and emission spectral measurements. In the absorption and emission titration studies, the solutions of the compounds (2  $\mu\text{M}$ ) are titrated with aliquots of RNA solutions to reach the different molar ratio to the dyes. Concentration of RNA in working solutions was 1 mM.

### Photostability of RuIr in solution

**RuIr** and SYTO RNA-select were dissolved in DMSO at a concentration of 10.0  $\mu\text{M}$ , respectively. The solutions were irradiated under a 500W iodine-tungsten lamp for 25 min at a distance of 250 mm away. An aqueous solution of sodium nitrite (50.0 g/L) as heat filter was placed between the samples and the lamp as a light filter (to cut off the light shorter than 400 nm). The photostabilities were expressed in the terms of remaining absorption (%) calculated from the changes of emission at the emission maximum before and after irradiation by iodine-tungsten lamp. The emission was determined on VARIAN CARY Eclipse Fluorescence Spectrophotometer.

### Interaction of RuIr with Biomolecules

The interaction of **RuIr** with RNA, DNA Chymotrysin, Lysozyme, BSA, HSA and Protease was carried out in a phosphate buffered saline (PBS) (pH=7.5, 20 mM) using luminescence detection. The emission was determined on VARIAN CARY Eclipse Fluorescence Spectrophotometer.

### Cell culture and staining

MCF-7 and Hella and LO2 cells were cultured in DEME (Invitrogen) supplemented with 10% FCS (Invitrogen). One day before imaging, cells were seeded in 24-well flat-bottomed plates. The next day, the live cells were incubated with 20  $\mu\text{M}$  **RuIr**, **RuRu** and **IrIr** for 2 h at 37 °C under 5%  $\text{CO}_2$  and then washed with phosphate-buffered saline (PBS) three times. Fluorescence imaging was then carried out with a TCS-SP2 confocal laser scanning microscope (Leica, Germany), using a 100 $\times$  objective lens. Before DNase and RNase digest and colocalization experiments, cultured cells grown on special confocal microscope dish were fixed by precooled methanol (-20 °C) for 15 min, washed with PBS for 5 min twice. For DNase and RNase digest test, three sets of pretreated MCF-7 cells were stained with 20  $\mu\text{M}$  **RuIr** for 10 min. A total of 100  $\mu\text{L}$  clean PBS (as control experiment), 30  $\mu\text{g/mL}$  DNase (Sigma), or 25  $\mu\text{g/mL}$  DNase-Free RNase (GE) was added into the three adjacent wells and incubated at 37 °C in 5%  $\text{CO}_2$  for 1 h. Cells were rinsed by clean PBS twice more before imaging. For each dye test, the fluorescent imaging pictures were obtained with an equal parameter for control. For cells colocalization experiment: fixed MCF-7 cells were stained with 20  $\mu\text{M}$  **RuIr** for 10 min. After rinsing with PBS twice, the same sample was stained with 2  $\mu\text{M}$  Hoechst 33258 and SYTO RNA-select for 10 min and then imaged.

### Synthetic procedures

#### Synthesis of metal complexes

**[Ru(bpy)<sub>3</sub>-(CH<sub>2</sub>)<sub>10</sub>-Ru(bpy)<sub>3</sub>]<sup>4+</sup>** and **[Ir(F<sub>2</sub>ppy)<sub>2</sub>-(CH<sub>2</sub>)<sub>10</sub>-Ir(F<sub>2</sub>ppy)<sub>2</sub>]<sup>2+</sup>**. The dimetallic complexes **[Ru(bpy)<sub>3</sub>-(CH<sub>2</sub>)<sub>10</sub>-Ru(bpy)<sub>3</sub>]<sup>4+</sup>** and **[Ir(F<sub>2</sub>ppy)<sub>2</sub>-(CH<sub>2</sub>)<sub>10</sub>-Ir(F<sub>2</sub>ppy)<sub>2</sub>]<sup>2+</sup>** were synthesized using a published method<sup>S1, 27, 28</sup> with suitable modification.

**[Ru(bpy)<sub>3</sub>-(CH<sub>2</sub>)<sub>10</sub>-Ir(F<sub>2</sub>ppy)<sub>2</sub>]<sup>3+</sup>**. The syntheses of **[Ru(bpy)<sub>3</sub>-(CH<sub>2</sub>)<sub>10</sub>-Ir(F<sub>2</sub>ppy)<sub>2</sub>]<sup>3+</sup>** were accomplished as described in Scheme S1. Under nitrogen atmosphere, **[Ru(bpy)<sub>3</sub>]2** (231 mg, 0.44 mmol) and bpy-C<sub>10</sub>-bpy (200 mg, 0.44 mmol) were refluxed in a mixture ethanol-H<sub>2</sub>O (8:1, 45 mL) for 24 h. After cooled and solvent removal, purification by preparative tin layer chromatography using as eluent the mixture CH<sub>3</sub>COCH<sub>3</sub>/H<sub>2</sub>O/saturated KNO<sub>3</sub> solution (15/1/1) gave Ru-C<sub>10</sub>-bpy (386 mg, 70%). Then a mixture of (F<sub>2</sub>ppy)<sub>2</sub>Ir(m-Cl)<sub>2</sub>Ir(F<sub>2</sub>ppy)<sub>2</sub> (300 mg, 0.24 mmol) and Ru-C<sub>10</sub>-bpy (554 mg, 0.48 mmol) were heated to reflux in a dichloromethane-ethanol mixture (3:1, 25 mL) for 4 h. After the solution was cooled to room temperature and filtered, a solution of NH<sub>4</sub>PF<sub>6</sub> (3.2 g, 19.6

mmol) in water (ca. 200 mL) was added slowly to the filtrate. The resulting precipitate was collected by filtration. The solid was washed with  $\text{CHCl}_3$  and diethyl ether. The solid was dried at 80 °C for 24 h to afford the desired compound as a red solid (826 mg, 92%).  $^1\text{H}$ -NMR (400 MHz,  $\delta$  ppm, Acetone- $d_6$ ): 1.25-1.45 (m, 12H), 1.62-1.82 (m, 4H), 2.83-2.94 (m, 4H), 5.79 (dd,  $J = 8.5, 2.3$  Hz, 2H), 6.67-6.85 (m, 2H), 7.24 (m, 2H), 7.45 (dd,  $J = 5.9, 1.6$  Hz, 1H), 7.53-7.64 (m, 6H), 7.68-7.78 (m, 1H), 7.84-7.96 (m, 3H), 7.98-8.11 (m, 8H), 8.14-8.25 (m, 6H), 8.30-8.42 (m, 3H), 8.65-8.94 (m, 8H).  $^{13}\text{C}$  NMR (100 MHz, Acetone- $d_6$ ):  $\delta$  29.99, 30.06, 34.92, 35.11, 98.66, 113.63, 113.79, 123.52, 123.72, 124.16, 124.31, 124.40, 124.55, 125.02, 125.21, 125.82, 127.73, 127.78, 127.84, 127.92, 128.78, 128.83, 137.95, 139.74, 140.09, 149.64, 149.75, 150.31, 150.95, 151.05, 151.68, 151.74, 151.79, 154.95, 155.51, 155.97, 156.76, 157.13, 157.24, 157.27, 157.31, 157.39, 163.87. HRMS (ESI,  $m/z$ ):  $1/2[(\text{M}-2\text{PF}_6)^+]$  calculated for  $\text{C}_{72}\text{H}_{62}\text{N}_{10}\text{F}_{10}\text{PRuIr}$  791.1705, found 791.1732.

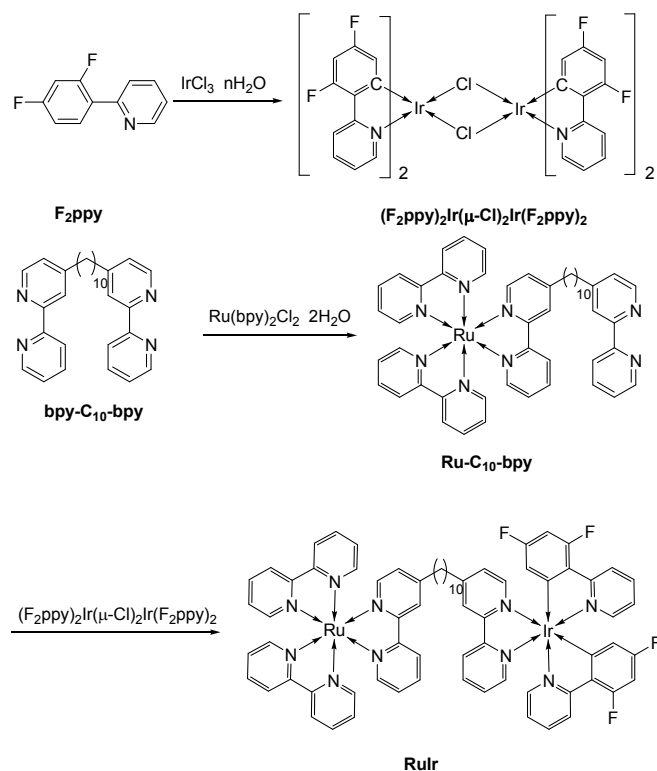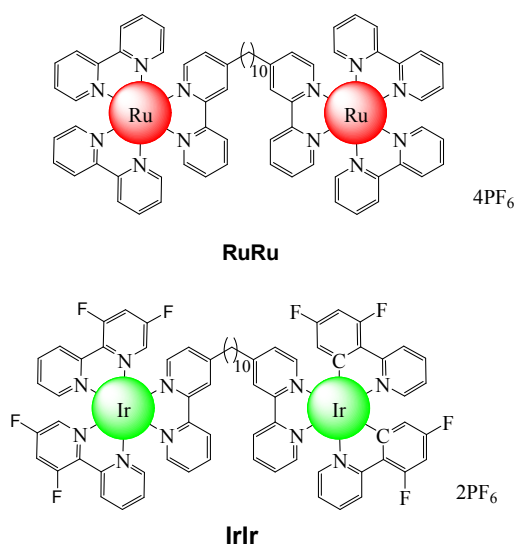

**Fig. S1** The chemical structures of **RuRu** and **IrIr**.

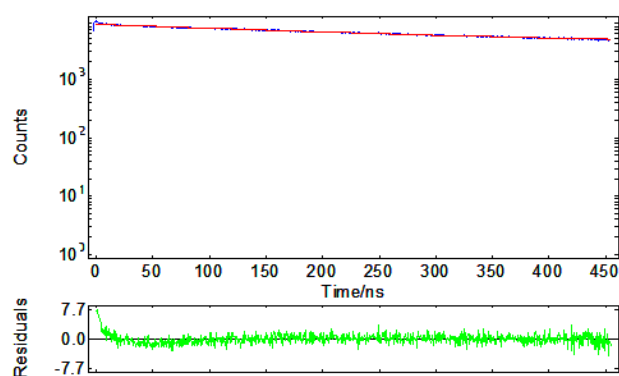

Fig. S2 Emission intensity decay for **RuIr** (10.0 μM) in acetonitrile at room temperature.

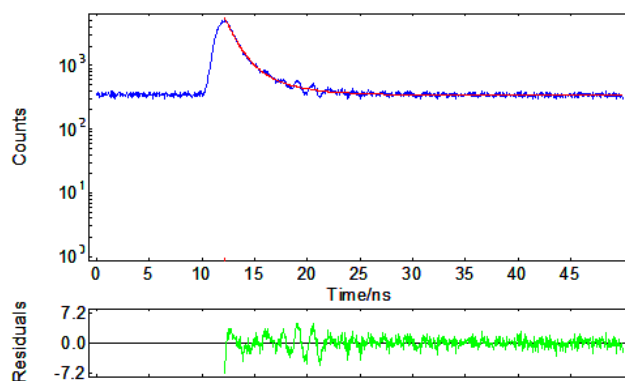

Fig. S3 Emission intensity decay for SYTO RNA-select (10.0 μM) in acetonitrile at room temperature.

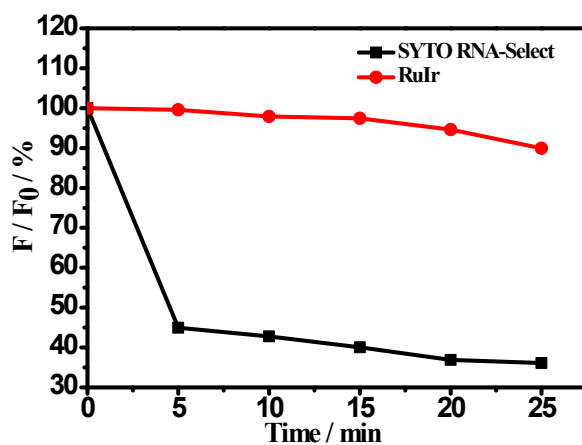

Fig. S4 Photostabilities of **RuIr** and SYTO RNA-select in solution.

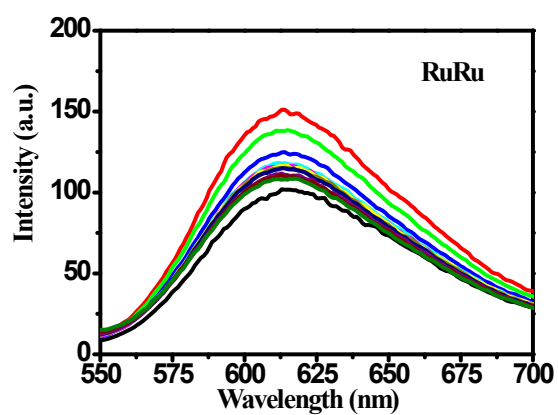

**Fig. S5** The luminescent spectra of **RuRu** (2.0  $\mu\text{M}$ ) in phosphate buffered saline (PBS) (pH=7.5, 20 mM) at 298 K with the addition of RNA.

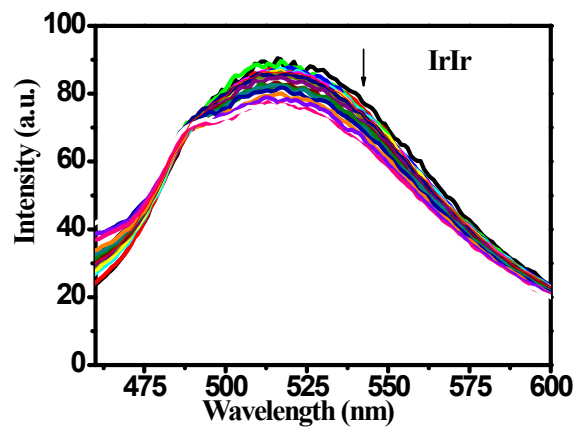

**Fig. S6** The luminescent spectra of **IrIr** (2.0  $\mu\text{M}$ ) in phosphate buffered saline (PBS) (pH=7.5, 20 mM) at 298 K with the addition of RNA.

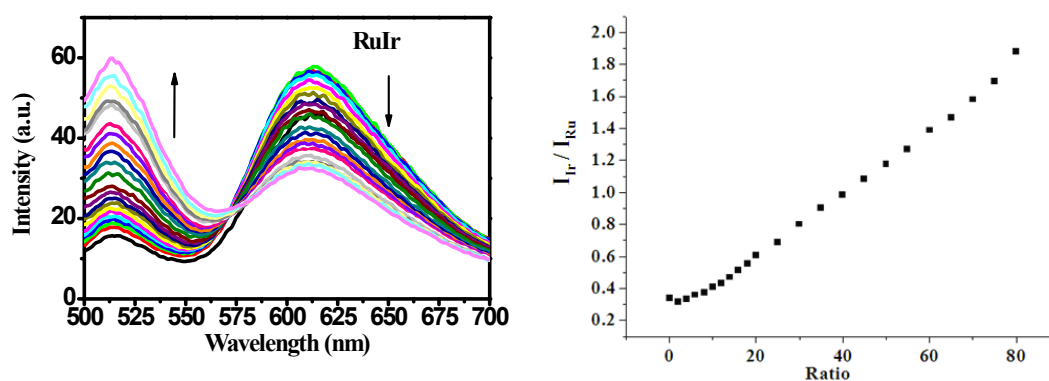

**Fig. S7** The luminescent spectra of **RuIr** (2.0 μM) in phosphate buffered saline (PBS) (pH=7.5, 20 mM) at 298 K with the addition of RNA and the ratiometric luminescence response between **RuIr** (2.0 μM) to RNA, “Ratio” means  $[RNA]/[RuIr]$ ,  $I_{Ir}/I_{Ru}$  stands for the ratio of the luminescence intensity of iridium moiety (523 nm) and ruthenium moiety (615 nm)..

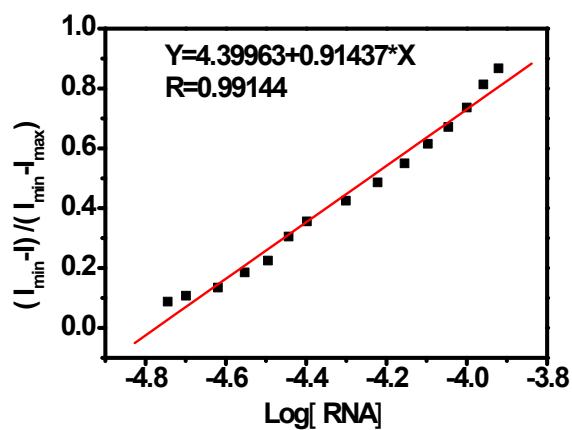

**Fig. S8** A linear calibration curve between the  $I_{Ir}/I_{Ru}$  ratio and RNA amount, “I” refers to  $I_{Ir}/I_{Ru}$ .

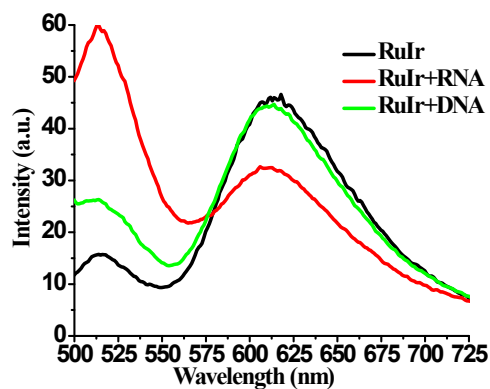

**Fig. S9** Emission spectra of **RuIr** (2.0  $\mu\text{M}$ ) in the presence and absence of 80-fold excess RNA and DNA.

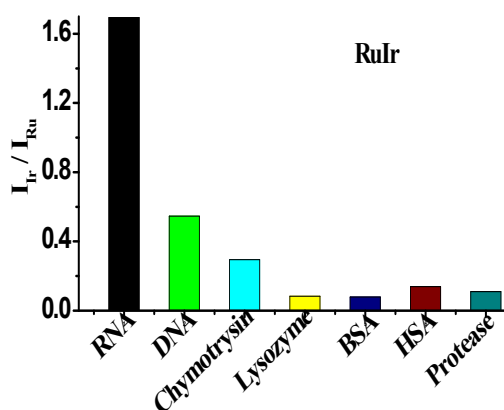

**Fig. S10** Emission spectra of **RuIr** (2.0  $\mu\text{M}$ ) in phosphate buffered saline (PBS) (pH=7.5, 20 mM) at 298 K in the presence and absence of 80-fold excess RNA, DNA, chymotrysin, lysozyme, BSA, HSA and protease.  $I_{\text{Ir}}/I_{\text{Ru}}$  stands for the ratio of the luminescence intensity of iridium moiety (523 nm) and ruthenium moiety (615 nm).

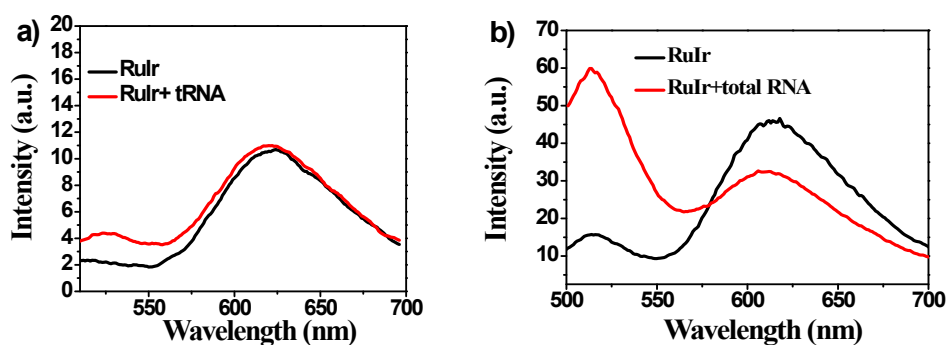

**Fig. S11** a) Emission spectra of **RuIr** (0.33  $\mu\text{M}$ ) in phosphate-buffered saline (PBS; pH 7.5, 20 mM) in the presence or absence of 80-fold excess tRNA. b) Emission spectra of **RuIr** (2.0  $\mu\text{M}$ ) in phosphate-buffered saline (PBS; pH 7.5, 20 mM) in the presence or absence of 80-fold excess total RNA.

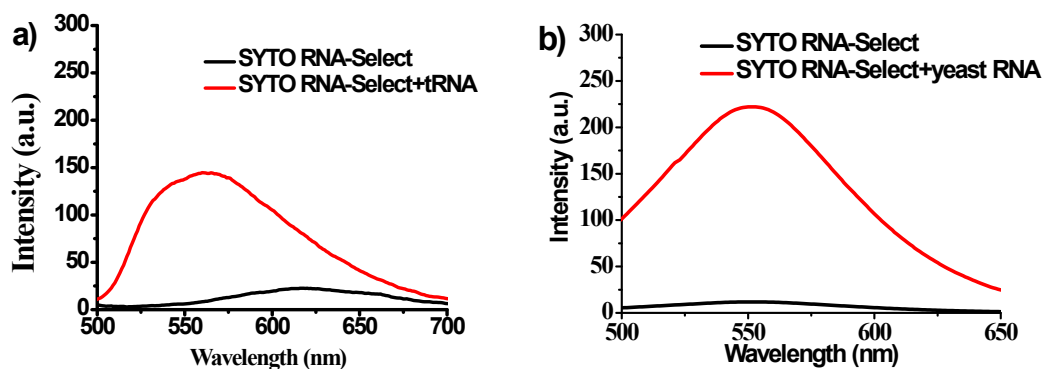

**Fig. S12** a) Emission spectra of SYTO RNA-Select (5.0  $\mu\text{M}$ ) in phosphate-buffered saline (PBS; pH 7.5, 20 mM) in the presence or absence of 2-fold excess tRNA. b) Emission spectra of SYTO RNA-Select (5.0  $\mu\text{M}$ ) in phosphate-buffered saline (PBS; pH 7.5, 20 mM) in the presence or absence of 2-fold excess yeast RNA.

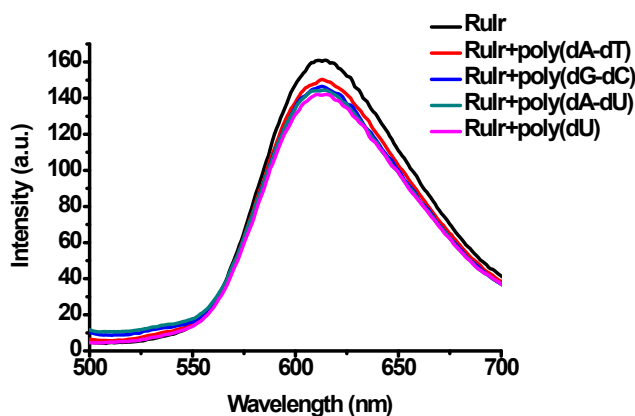

**Fig. S13** Emission spectral of complex **RuIr** (2  $\mu\text{M}$ ) in PBS (pH=7.5, 20 mM) at 298 K in the presence of 20-fold excess poly(dA-dT), poly(dG-dC), poly(dA-dU) and poly(dU).

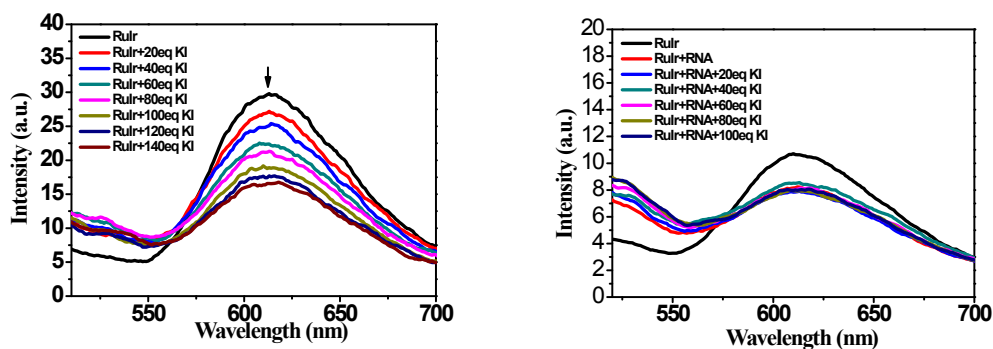

**Fig. S14** Emission spectra of complex **RuIr** (0.33  $\mu\text{M}$ ) alone and with the presence of 60 eq RNA in phosphate buffered saline (PBS) (pH=7.5, 20 mM) with the addition of KI.

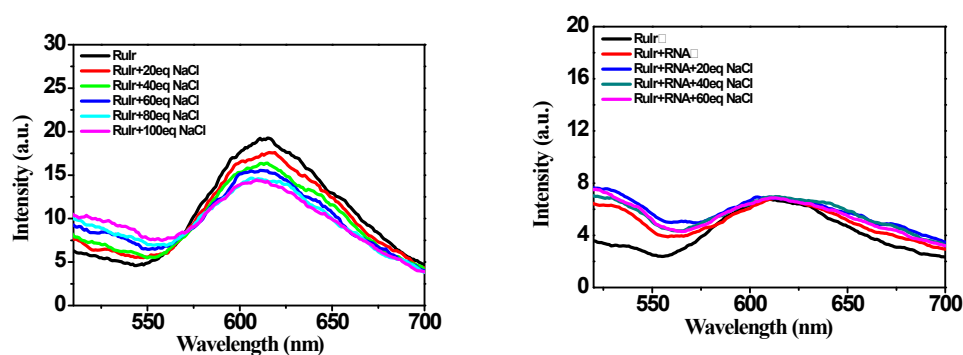

**Fig. S15** Emission spectra of complex **RuIr** (0.33  $\mu$ M) alone and with the presence of 60 eq RNA in phosphate buffered saline (PBS) (pH=7.5, 20 mM) with the addition of NaCl.

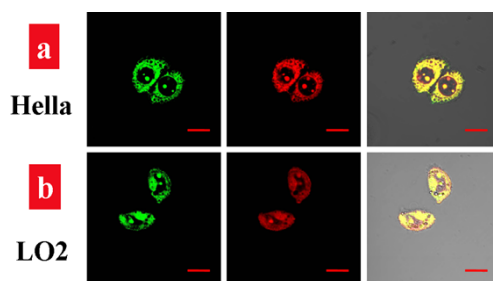

**Fig. S16** Luminescence microscope images of live a) Hella cells b) and LO2 cells incubated with 20  $\mu$ M **RuIr** for 2h at 37  $^{\circ}$ C. Scale bar: 20  $\mu$ m.

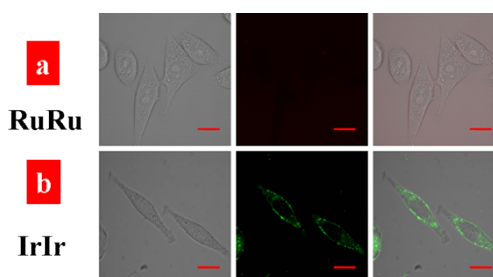

**Fig. S17** a) Incubation of live MCF-7 cells with **RuRu** (20  $\mu$ M, 2 h) shows no staining of live cells. The red channel was stained with **RuRu** with excitation at 458 nm and a scan range of 590–640 nm. b) Live MCF-7 breast cancer cells incubated with **IrIr** (20  $\mu$ M, 2 h). The green channel was stained with **IrIr** with excitation at 405 nm and a scan range of 510–560 nm. From left to right: Optical, luminescence, and overlay images. Scale bar : 20  $\mu$ m.



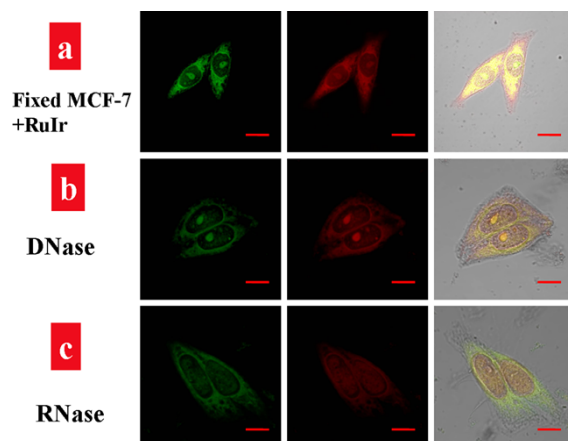

**Fig. S18** Treatment of fixed MCF-7 cells with DNase and RNase. **RuIr** was used at a concentration of 20  $\mu\text{M}$ . From left to right: green channel (500–560 nm), red channel (590–640 nm), and overlay images. Scale bar: 20  $\mu\text{m}$ .

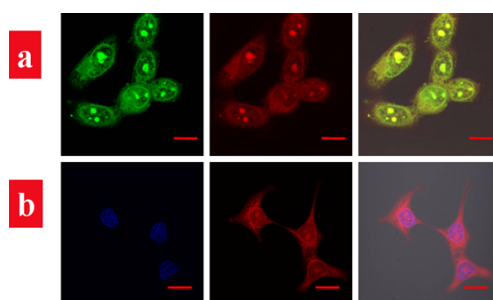

**Fig. S19** Colocalization of **RuIr** (20  $\mu\text{M}$ ) and a) SYTO RNA-Select dye (5  $\mu\text{M}$ ) and b) Hoechst33258 (5  $\mu\text{M}$ ), images by fixed MCF-7 cell loading. a) Co-staining of **RuIr** with SYTO RNA-Select dye. Left, RNA-Select dye (green channel: 485–510 nm; excitation at 405 nm); middle, **RuIr** luminescence (red channel: 590–640 nm; excitation at 458 nm); right, merged image. b) Colocalization of **RuIr** and Hoechst33258. Left, Hoechst33258 (blue channel: 429–470 nm; excitation at 405 nm); middle, **RuIr** luminescence (red channel: 590–640 nm; excitation at 458 nm); right, merged image. Scale bar: 20  $\mu\text{m}$ .
